# Supplementary material for: Self‐reported word‐finding complaints are associated with cerebrospinal fluid amyloid beta and atrophy in cognitively normal older adults
Source: PubMed Central journal article supplement — Alzheimers Dement (Amst). 2022 Feb 9;14(1):e12274. doi: 10.1002/dad2.12274 (PMC8828990; doi:10.1002/dad2.12274), 2022-02-09
Supplement: DAD2-14-e12274-s001.pdf [file DAD2-14-e12274-s001.pdf]

**eTable I** Frequency of subjective complaints among CN

| Type of Complaint |                                                                                                    | Frequency               |            |                         |            |                                 |            |                            |           |
|-------------------|----------------------------------------------------------------------------------------------------|-------------------------|------------|-------------------------|------------|---------------------------------|------------|----------------------------|-----------|
|                   |                                                                                                    | 1 - Better or no change |            | 2 - Occassionally worse |            | 3 - Consistently a little worse |            | 4- Consistently much worse |           |
| MEMORY1           | 1. Remembering a few shopping items without a list.                                                | 116                     | <b>49%</b> | 83                      | <b>35%</b> | 28                              | <b>12%</b> | 12                         | <b>5%</b> |
| MEMORY2           | 2. Remembering things that happened recently (such as recent outings, events in the news).         | 130                     | <b>54%</b> | 77                      | <b>32%</b> | 27                              | <b>11%</b> | 5                          | <b>2%</b> |
| MEMORY3           | 3. Recalling conversations a few days later.                                                       | 112                     | <b>47%</b> | 93                      | <b>39%</b> | 31                              | <b>13%</b> | 3                          | <b>1%</b> |
| MEMORY4           | 4. Remembering where I have placed objects.                                                        | 66                      | <b>28%</b> | 111                     | <b>46%</b> | 53                              | <b>22%</b> | 9                          | <b>4%</b> |
| MEMORY5           | 5. Repeating stories and/or questions.                                                             | 108                     | <b>45%</b> | 102                     | <b>43%</b> | 23                              | <b>10%</b> | 6                          | <b>3%</b> |
| MEMORY6           | 6. Remembering the current date or day of the week.                                                | 178                     | <b>74%</b> | 48                      | <b>20%</b> | 9                               | <b>4%</b>  | 4                          | <b>2%</b> |
| MEMORY7           | 7. Remembering I have already told someone something.                                              | 94                      | <b>39%</b> | 112                     | <b>47%</b> | 29                              | <b>12%</b> | 4                          | <b>2%</b> |
| MEMORY8           | 8. Remembering appointments, meetings, or engagements.                                             | 137                     | <b>57%</b> | 79                      | <b>33%</b> | 19                              | <b>8%</b>  | 4                          | <b>2%</b> |
| LANG1             | <b>1. Forgetting the names of objects.</b>                                                         | 86                      | <b>36%</b> | 113                     | <b>47%</b> | 37                              | <b>15%</b> | 3                          | <b>1%</b> |
| LANG2             | 2. Verbally giving instructions to others.                                                         | 179                     | <b>75%</b> | 47                      | <b>20%</b> | 12                              | <b>5%</b>  | 1                          | <b>0%</b> |
| LANG3             | <b>3. Finding the right words to use in conversations.</b>                                         | 74                      | <b>31%</b> | 121                     | <b>51%</b> | 31                              | <b>13%</b> | 13                         | <b>5%</b> |
| LANG4             | 4. Communicating thoughts in a conversation.                                                       | 133                     | <b>56%</b> | 78                      | <b>33%</b> | 23                              | <b>10%</b> | 5                          | <b>2%</b> |
| LANG5             | 5. Following a story in a book or on TV.                                                           | 184                     | <b>77%</b> | 46                      | <b>19%</b> | 7                               | <b>3%</b>  | 2                          | <b>1%</b> |
| LANG6             | 6. Understanding the point of what other people are trying to say.                                 | 192                     | <b>80%</b> | 42                      | <b>18%</b> | 5                               | <b>2%</b>  | 0                          | <b>0%</b> |
| LANG7             | 7. Remembering the meaning of common words.                                                        | 200                     | <b>84%</b> | 35                      | <b>15%</b> | 4                               | <b>2%</b>  | 0                          | <b>0%</b> |
| LANG8             | 8. Describing a program I have watched on TV.                                                      | 165                     | <b>69%</b> | 60                      | <b>25%</b> | 14                              | <b>6%</b>  | 0                          | <b>0%</b> |
| LANG9             | 9. Understanding spoken directions or instructions.                                                | 163                     | <b>68%</b> | 67                      | <b>28%</b> | 7                               | <b>3%</b>  | 2                          | <b>1%</b> |
| VISSPAT1          | 1. Following a map to find a new location.                                                         | 204                     | <b>85%</b> | 27                      | <b>11%</b> | 8                               | <b>3%</b>  | 0                          | <b>0%</b> |
| VISSPAT2          | 2. Reading a map and helping with directions when someone else is driving.                         | 200                     | <b>84%</b> | 32                      | <b>13%</b> | 7                               | <b>3%</b>  | 0                          | <b>0%</b> |
| VISSPAT3          | 3. Finding my car in a parking lot.                                                                | 158                     | <b>66%</b> | 72                      | <b>30%</b> | 7                               | <b>3%</b>  | 2                          | <b>1%</b> |
| VISSPAT4          | 4. Finding my way back to a meeting spot in the mall or other location.                            | 181                     | <b>76%</b> | 49                      | <b>21%</b> | 7                               | <b>3%</b>  | 2                          | <b>1%</b> |
| VISSPAT6          | 5. Finding my way around a familiar neighborhood.                                                  | 222                     | <b>93%</b> | 16                      | <b>7%</b>  | 1                               | <b>0%</b>  | 0                          | <b>0%</b> |
| VISSPAT7          | 6. Finding my way around a familiar store.                                                         | 220                     | <b>92%</b> | 18                      | <b>8%</b>  | 1                               | <b>0%</b>  | 0                          | <b>0%</b> |
| VISSPAT8          | 7. Finding my way around a house visited many times.                                               | 231                     | <b>97%</b> | 8                       | <b>3%</b>  | 0                               | <b>0%</b>  | 0                          | <b>0%</b> |
| PLAN1             | 1. Planning a sequence of stops on a shopping trip.                                                | 200                     | <b>84%</b> | 35                      | <b>15%</b> | 4                               | <b>2%</b>  | 0                          | <b>0%</b> |
| PLAN2             | 2. The ability to anticipate weather changes and plan accordingly (i.e., bring a coat or umbrella) | 224                     | <b>94%</b> | 14                      | <b>6%</b>  | 1                               | <b>0%</b>  | 0                          | <b>0%</b> |
| PLAN3             | 3. Developing a schedule in advance of anticipated events.                                         | 207                     | <b>87%</b> | 30                      | <b>13%</b> | 2                               | <b>1%</b>  | 0                          | <b>0%</b> |
| PLAN4             | 4. Thinking things through before acting.                                                          | 179                     | <b>75%</b> | 57                      | <b>24%</b> | 3                               | <b>1%</b>  | 0                          | <b>0%</b> |
| PLAN5             | 5. Thinking ahead.                                                                                 | 201                     | <b>84%</b> | 36                      | <b>15%</b> | 2                               | <b>1%</b>  | 0                          | <b>0%</b> |

|         |                                                                                                         |     |            |    |            |    |            |   |           |
|---------|---------------------------------------------------------------------------------------------------------|-----|------------|----|------------|----|------------|---|-----------|
| ORGAN1  | 1. Keeping living and work space organized.                                                             | 145 | <b>61%</b> | 69 | <b>29%</b> | 23 | <b>10%</b> | 2 | <b>1%</b> |
| ORGAN2  | 2. Balancing the checkbook without error.                                                               | 199 | <b>83%</b> | 37 | <b>15%</b> | 3  | <b>1%</b>  | 0 | <b>0%</b> |
| ORGAN3  | 3. Keeping financial records organized.                                                                 | 190 | <b>79%</b> | 43 | <b>18%</b> | 5  | <b>2%</b>  | 1 | <b>0%</b> |
| ORGAN4  | 4. Prioritizing tasks by importance.                                                                    | 184 | <b>77%</b> | 47 | <b>20%</b> | 8  | <b>3%</b>  | 0 | <b>0%</b> |
| ORGAN5  | 5. Keeping mail and papers organized.                                                                   | 150 | <b>63%</b> | 65 | <b>27%</b> | 22 | <b>9%</b>  | 2 | <b>1%</b> |
| ORGAN6  | 6. Using an organized strategy to manage a medication schedule involving multiple medications.          | 213 | <b>89%</b> | 23 | <b>10%</b> | 3  | <b>1%</b>  | 0 | <b>0%</b> |
| DIVATT1 | 1. The ability to do two things at once.                                                                | 125 | <b>52%</b> | 94 | <b>39%</b> | 14 | <b>6%</b>  | 6 | <b>3%</b> |
| DIVATT2 | 2. Returning to a task after being interrupted.                                                         | 132 | <b>55%</b> | 85 | <b>36%</b> | 18 | <b>8%</b>  | 4 | <b>2%</b> |
| DIVATT3 | 3. The ability to concentrate on a task without being distracted by external things in the environment. | 126 | <b>53%</b> | 87 | <b>36%</b> | 22 | <b>9%</b>  | 4 | <b>2%</b> |
| DIVATT4 | 4. Cooking or working and talking at the same time.                                                     | 155 | <b>65%</b> | 63 | <b>26%</b> | 17 | <b>7%</b>  | 4 | <b>2%</b> |
